# Supplementary material for: Single-crystal N-doped SiC nanochannel array photoanode for efficient photoelectrochemical water splitting
Source: Royal Society of Chemistry journal article supplement (doi:10.1039/c9tc00061e), 2019-01-01
Supplement: c9tc00061e1.pdf [file c9tc00061e1.pdf]

**[Electronic Supplementary Information](#)**

**Single-crystal N-doped SiC Nanochannel Array Photoanode for Efficient  
Photoelectrochemical Water Splitting**

*Shanliang Chen, Lianfu Zhao, Lin Wang, Fengmei Gao\* and Weiyu Yang\**

Institute of Materials, Ningbo University of Technology, Ningbo City, 315016, P.R. China.

***\*Corresponding Authors:***

***E-mail:*** [fmgao@163.com](mailto:fmgao@163.com) (M. Feng) and [weiyuyang@tsinghua.org.cn](mailto:weiyuyang@tsinghua.org.cn) (W. Yang)

***Tel:*** +86-574-87080966, ***Fax:*** +86-574-87081221

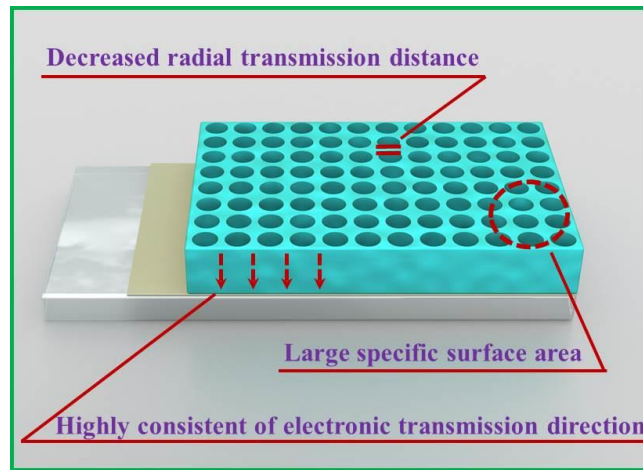

**Fig. S1** The schematic diagram for showing the highly consistent of electronic transmission direction, decreased radial transmission distance, and large specific surface area of the SiC photoanode.
